# Supplementary material for: Synthesis, crystal structure, optical and electrochemical properties of novel diphenylether-based formazan derivatives
Source: Royal Society of Chemistry journal article supplement (doi:10.1039/c4nj02353f), 2015-01-01
Supplement: c4nj02353f1.pdf [file c4nj02353f1.pdf]

Electronic Supplementary Information (ESI)

**Synthesis, crystal structure, optical and electrochemical properties of novel  
diphenylether-based formazan derivatives**

Gulsen Turkoglu,<sup>a</sup> Halil Berber\*<sup>a</sup> and Ibrahim Kani<sup>a</sup>

*<sup>a</sup>Anadolu University, Faculty of Science, Chemistry Department, 26470 Eskişehir, Turkey.*

\*Corresponding author. Tel: +90 222 335 05 80; ext. 4827; fax: +90 222 320 49 10

[hberber@anadolu.edu.tr](mailto:hberber@anadolu.edu.tr)

## 1. Experimental procedures and characterization data

### General Procedure for the Synthesis of 1-(4-methoxybenzylidene)-2-phenylhydrazine (3a).

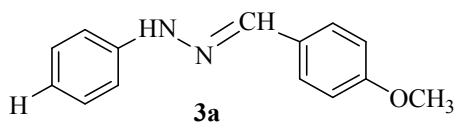

To a solution of 1.36 g of 4-methoxybenzaldehyde (10.0 mmol) in 25 mL of methanol was added a solution of 1.09 g of phenylhydrazine (0.90 mL, 10.0 mmol) in 25 mL of methanol dropwise at 60 °C. The reaction mixture was stirred for 2 hours and cooled down to room temperature for 30 min. The yellow precipitate was filtered off and dried in an oven at 60 °C. The crude product was recrystallized from methanol. The compound **3a** was obtained as bright yellow needles in 98% yield (2.21 g); m.p. 130–131 °C; FT-IR (KBr,  $\text{cm}^{-1}$ )  $\nu_{\text{max}}$ : 3315 (s), 1365 (s), 1527-1506 (s), 3022 (s), 1596 (s), 1296, 1244 (m).  $^1\text{H}$  NMR (500 MHz,  $\text{CDCl}_3$ ):  $\delta$  7.62 (s, 1H), 7.60 (d,  $J = 8.70$  Hz, 2H), 7.47 (s, 1H), 7.28 (t,  $J = 7.10$  Hz, 2H), 7.11 (d,  $J = 8.50$  Hz, 2H), 6.91 (d,  $J = 9.00$  Hz, 2H), 6.85 (t,  $J = 7.25$  Hz, 1H), 3.84 (s, 3H).  $^{13}\text{C}$  NMR (126 MHz,  $\text{CDCl}_3$ ):  $\delta$  159.98, 144.95, 137.36, 129.25, 127.56, 119.78, 114.10, 55.32. Anal. Calcd. for  $\text{C}_{14}\text{H}_{14}\text{N}_2\text{O}$  (226.27, %): C, 74.31; H, 6.24; N, 12.38. Found: C, 74.06; H, 6.23; N, 12.37.

The other compounds (**3b–3h**) were prepared in a similar manner.

### 1-(4-Methoxybenzylidene)-2-(4-methoxyphenyl)hydrazine (3b).

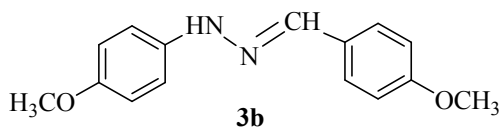

Light cream solid (crystallized from methanol). Yield 2.11 g (83%); m.p. 138–139 °C; FT-IR (KBr,  $\text{cm}^{-1}$ )  $\nu_{\text{max}}$ : 3309 (s), 1313 (s), 1524-1506 (s), 3031 (s), 1606 (s), 1245 (m).  $^1\text{H}$  NMR (500 MHz,  $\text{CDCl}_3$ ):  $\delta$  8.06 (s, 1H), 8.06 (d,  $J = 9.05$  Hz, 2H), 7.85 (d,  $J = 9.15$  Hz, 2H), 7.64 (s, 1H), 7.01 (d,  $J = 8.10$  Hz, 2H), 6.93 (d,  $J = 8.00$  Hz, 2H), 3.89 (s, 3H), 3.87 (s, 3H).  $^{13}\text{C}$  NMR (126 MHz,  $\text{CDCl}_3$ ):  $\delta$  162.75, 136.84, 132.26, 131.98, 129.45, 127.37, 114.30, 113.91, 55.57, 55.45. Anal. Calcd. for  $\text{C}_{15}\text{H}_{16}\text{N}_2\text{O}_2$  (256.30,

%) : C, 70.29; H, 6.29; N, 10.93. Found: C, 70.45; H, 6.10; N, 11.20.

**1-(4-Methoxybenzylidene)-2-(4-chlorophenyl)hydrazine (3c).**

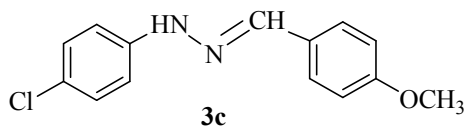

Light white needles (crystallized from methanol).

Yield 1.40 g (77%); m.p. 159–160 °C; FT-IR (KBr,  $\text{cm}^{-1}$ )  $\nu_{\text{max}}$  : 3309 (s), 1357 (s), 1523-1506 (s), 3012 (s), 1606 (s), 1292-1253 (m).  $^1\text{H}$  NMR (500 MHz,  $\text{CDCl}_3$ ):  $\delta$  7.85 (s, 1H), 7.65 (s, 1H), 7.58 (d,  $J = 8.52$  Hz, 2H), 7.21 (dd,  $J = 8.15$  and 2.32 Hz, 2H), 7.02 (d,  $J = 8.00$  Hz, 2H), 6.91 (d,  $J = 8.48$  Hz, 2H), 3.83 (s, 3H).  $^{13}\text{C}$  NMR (126 MHz,  $\text{CDCl}_3$ ):  $\delta$  164.60, 143.52, 138.07, 131.98, 129.36, 128.95, 127.65, 114.13, 113.73, 55.33. Anal. Calcd. for  $\text{C}_{14}\text{H}_{13}\text{ClN}_2\text{O}$  (260.72, %): C, 64.49; H, 5.03; N, 10.74. Found: C, 64.33; H, 4.95; N, 10.73.

**1-(4-Methoxybenzylidene)-2-(4-bromophenyl)hydrazine (3d).**

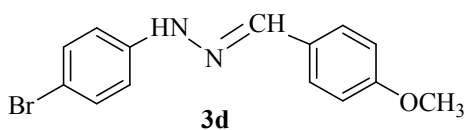

Light cream solid (crystallized from methanol). Yield 1.30 g (80%); m.p. 158–159 °C; FT-IR (KBr,  $\text{cm}^{-1}$ )  $\nu_{\text{max}}$  : 3307 (s), 1357 (s), 1504 (s), 3006 (s), 1604 (s), 1292-1253 (m).  $^1\text{H}$  NMR (500 MHz,  $\text{CDCl}_3$ ):  $\delta$  7.86 (s, 1H), 7.64 (s, 1H), 7.59 (d,  $J = 8.40$  Hz, 2H), 7.34 (d,  $J = 9.12$  Hz, 2H), 6.97 (d,  $J = 9.01$  Hz, 2H), 6.90 (d,  $J = 8.28$  Hz, 2H), 3.86 (s, 3H).  $^{13}\text{C}$  NMR (126 MHz,  $\text{CDCl}_3$ ):  $\delta$  160.20, 143.96, 138.18, 131.99, 127.68, 114.20, 114.14, 55.34. Anal. Calcd. for  $\text{C}_{14}\text{H}_{13}\text{BrN}_2\text{O}$  (305.17, %): C, 55.10; H, 4.29; N, 9.18. Found: C, 54.98; H, 4.13; N, 9.06.

**1-(4-Methoxybenzylidene)-2-(4-fluorophenyl)hydrazine (3e).**

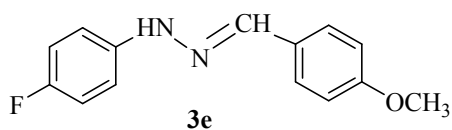

Light brown solid (from methanol). Yield 2.03 g

(83%); m.p. 140–141 °C; FT-IR (KBr,  $\text{cm}^{-1}$ )  $\nu_{\text{max}}$  : 3311 (s), 1359 (s), 1595-1502 (s), 3020 (s),

1604 (s), 1245-1211 (m).  $^1\text{H}$  NMR (500 MHz,  $\text{CDCl}_3$ ):  $\delta$  7.84 (s, 1H), 7.66 (s, 1H), 7.58 (d,  $J = 9.00$  Hz, 2H), 7.04 (dd,  $J = 9.05$ , 4.53 Hz, 2H), 6.98 (d,  $J = 8.54$  Hz, 2H), 6.90 (d,  $J = 8.28$  Hz, 2H), 3.84 (s, 3H).  $^{13}\text{C}$  NMR (126 MHz,  $\text{CDCl}_3$ ):  $\delta$  160.04, 158.06, 156.17, 141.33, 137.61, 132.29, 129.71, 127.98, 115.81, 113.73, 55.32. Anal. Calcd. for  $\text{C}_{14}\text{H}_{13}\text{FN}_2\text{O}$  (244.26, %): C, 68.84; H, 5.36; N, 11.47. Found: C, 68.60; H, 5.14; N, 11.20.

### 1-(4-Methoxybenzylidene)-2-(4-nitrophenyl)hydrazine (3f).

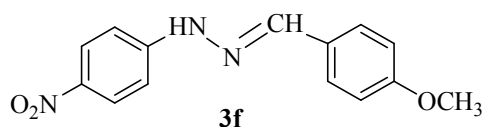

Light red needles (from methanol). Yield 1.32 g (75%); m.p. 164–165 °C; FT-IR (KBr,  $\text{cm}^{-1}$ )  $\nu_{\text{max}}$ : 3315 (s), 1365 (s), 1525-1500 (s), 3051 (s), 1618 (s), 1271-1209 (m), 1400 (s), 1298 (s).  $^1\text{H}$  NMR (500 MHz,  $\text{CDCl}_3$ ):  $\delta$  8.17 (d,  $J = 8.86$  Hz, 2H), 7.96 (s, 1H), 7.76 (s, 1H), 7.64 (d,  $J = 8.70$  Hz, 2H), 7.10 (d,  $J = 8.24$  Hz, 2H), 6.94 (d,  $J = 8.62$  Hz, 2H), 3.86 (s, 3H).  $^{13}\text{C}$  NMR (126 MHz,  $\text{CDCl}_3$ ):  $\delta$  160.91, 149.64, 141.32, 140.07, 128.26, 126.82, 126.20, 114.29, 111.49, 55.38. Anal. Calcd. for  $\text{C}_{14}\text{H}_{13}\text{N}_3\text{O}_3$  (271.27, %): C, 61.99; H, 4.83; N, 15.49. Found: C, 62.10; H, 4.84; N, 15.53.

### 1-(4-Methoxybenzylidene)-2-(3,4-dimethylphenyl)hydrazine (3g).

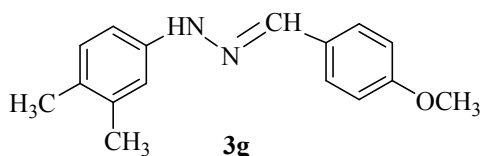

Light brown solid (from methanol). Yield 2.10 g (83%); m.p. 104–106 °C; FT-IR (KBr,  $\text{cm}^{-1}$ )  $\nu_{\text{max}}$ : 3319 (s), 1353 (s), 1510 (s), 3020 (s), 1614 (s), 1298-1247 (m).  $^1\text{H}$  NMR (500 MHz,  $\text{CDCl}_3$ ):  $\delta$  7.86 (s, 1H), 7.63 (s, 1H), 7.60 (d,  $J = 8.50$  Hz, 2H), 7.43 (d,  $J = 7.80$  Hz, 1H), 7.02 (d,  $J = 8.00$  Hz, 1H), 6.91 (d,  $J = 8.50$  Hz, 2H), 6.83 (d,  $J = 7.50$  Hz, 1H), 3.84 (s, 3H), 2.25 (s, 3H), 2.20 (s, 3H).  $^{13}\text{C}$  NMR (126 MHz,  $\text{CDCl}_3$ ):  $\delta$  159.83, 136.78, 136.71, 132.26, 130.22, 128.31, 127.54, 114.05, 110.16, 55.31, 20.03, 18.89. Anal. Calcd. for  $\text{C}_{16}\text{H}_{18}\text{N}_2\text{O}$  (254.33, %): C, 75.56; H, 7.13; N, 11.01. Found: C, 75.38; H, 6.87; N, 10.92.

**1-(4-Methoxybenzylidene)-2-(2,4-dinitrophenyl)hydrazine (3h).**

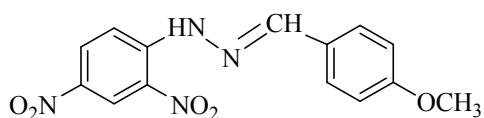

Light orange colored powder (from methanol). Yield

2.65 g (84%); m.p. 258–260 °C; FT-IR (KBr,  $\text{cm}^{-1}$ )  $\nu_{\text{max}}$ : 3271 (s), 1330 (s), 1585-1510 (s), 3012 (s), 1622 (s), 1249 (m), 1330 (s).  $^1\text{H}$  NMR (500 MHz,  $\text{CDCl}_3$ ):  $\delta$  11.07 (s, 1H), 8.94 (s, 1H), 8.14 (dd,  $J = 8.78$ , 2.65 Hz, 1H), 7.88 (d,  $J = 8.32$  Hz, 2H), 7.52 (d,  $J = 8.10$  Hz, 2H), 6.78 (d,  $J = 8.50$  Hz, 2H), 3.67 (s, 3H).  $^{13}\text{C}$  NMR (126 MHz,  $\text{CDCl}_3$ ):  $\delta$  162.52, 148.32, 145.33, 144.50, 130.47, 129.84, 126.29, 124.10, 1107.18, 115.04, 55.98. Anal. Calcd. for  $\text{C}_{14}\text{H}_{12}\text{N}_4\text{O}_5$  (316.27, %): C, 53.17; H, 3.82; N, 17.71. Found: C, 52.89; H, 3.67; N, 17.64.

## 2. Crystallographic data for compound 5e.

**Table S1** The some selected bond lengths (Å) and angles (°) of compound 5e

|             |          |             |          |
|-------------|----------|-------------|----------|
| C2-O2       | 1.374(3) | F1-C18      | 1.357(3) |
| N4-N3       | 1.277(3) | N4-C15      | 1.415(3) |
| N1-C8       | 1.307(3) | N1-N2       | 1.335(3) |
| N3-C8       | 1.407(3) | N2-C9       | 1.380(3) |
| C1-O2       | 1.422(3) | C9-C14      | 1.388(4) |
| C14-O1      | 1.396(3) | O1-C21      | 1.390(3) |
| N3-N4-C15   | 115.3(2) | N4-N3-C8    | 114.8(2) |
| C8-N1-N2    | 120.1(2) | N3-C8-C5    | 114.3(2) |
| C20-C15-N4  | 125.7(2) | C16-C15-N4  | 114.1(2) |
| N1-C8-C5    | 116.5(2) | C2-O2-C1    | 116.9(2) |
| F1-C18-C17  | 118.2(2) | N1-C8-N3    | 129.2(2) |
| N2-C9-C14   | 118.0(2) | F1-C18-C19  | 118.4(2) |
| N2-C9-C10   | 122.8(2) | N1-N2-C9    | 120.3(2) |
| C10-C11-C11 | 118.4(2) | C12-C11-C11 | 119.1(2) |
| C13-C14-O1  | 121.4(2) | C9-C14-O1   | 117.2(2) |
| C21-O1-C14  | 118.2(2) | C22-C21-O1  | 123.5(2) |

## 3. Absorption spectra $\lambda_{\max}$ values of formazans 5a–5h in various solvents.

**Table S2** Absorption spectral  $\lambda_{\text{max}}$  values of formazans **5a–5h** in various solvents.**4. NMR Spectra of Final Compounds (5a–5h)**

| Comp.     | $\lambda_{\text{max}}$ .(nm) |     |          |          |         |          |          |
|-----------|------------------------------|-----|----------|----------|---------|----------|----------|
|           | DMSO                         | DMF | EtOH     | MeOH     | Acetone | Dioxane  | EtOAc    |
| <b>5a</b> | 513                          | 515 | 501      | 506      | 504     | 507      | 507      |
|           | 293                          | 302 | 291      | 289      |         | 293      | 293      |
| <b>5b</b> | 521                          | 513 | 511,     | 493      | 496     | 500      | 499      |
|           | 301                          | 301 | 499, 272 | 299      |         | 275      | 300, 272 |
| <b>5c</b> | 540                          | 531 | 533      | 525      | 523     | 531      | 531      |
|           | 299                          | 299 | 522, 298 | 298      |         | 295      | 298      |
| <b>5d</b> | 533                          | 532 | 531      | 521      | 523     | 531      | 531      |
|           | 295                          | 298 | 297      | 295      |         | 296      | 298      |
| <b>5e</b> | 512                          | 507 | 508      | 504      | 506     | 507      | 508      |
|           | 294                          | 308 | 293      | 294      |         | 292      | 294      |
| <b>5f</b> | 475                          | 499 | 533      | 546      | 526     | 545      | 534      |
|           | 385                          | 367 | 367, 301 | 393, 289 | 367     | 362, 300 | 362, 302 |
| <b>5g</b> | 513                          | 508 | 501      | 501      | 504     | 504      | 502      |
|           | 301                          | 301 | 297      | 297      |         | 296      | 296      |
| <b>5h</b> | 400                          | 390 | 388      | 390      | 384     | 375, 352 | 379      |

  

| Comp.     | Propanol | CHCl <sub>3</sub> | THF      | 1-Butanol | Toluene | Cyclohexane | n-Hexane |
|-----------|----------|-------------------|----------|-----------|---------|-------------|----------|
| <b>5a</b> | 505      | 507               | 509      | 511       | 515     | 510         | 506      |
|           | 293      | 296               | 288      | 293       | 295     | 291         | 291      |
| <b>5b</b> | 500      | 505               | 505      | 498       | 518     | 506         | 494      |
|           | 301, 275 | 303               | 302      | 275       | 302     | 300, 275    | 366, 301 |
| <b>5c</b> | 531      | 531               | 534      | 532       | 538     | 535         | 532      |
|           | 299      | 298               | 302      | 298       | 298     | 298         | 299      |
| <b>5d</b> | 532      | 530               | 530      | 531       | 535     | 533         | 528      |
|           | 298      | 298               | 293      | 296       | 296     | 295         | 297      |
| <b>5e</b> | 509      | 509               | 511      | 510       | 522     | 519         | 516      |
|           | 293      | 296               | 292      | 291       |         | 292         | 291      |
| <b>5f</b> | 535      | 546               | 537      | 534       | 554     | 551         | 541      |
|           | 360, 304 | 371, 304          | 365, 303 | 365, 303  | 365     | 358, 299    | 360, 305 |
| <b>5g</b> | 503      | 504               | 508      | 504       | 516     | 500         | 500      |
|           | 299      | 299               | 297      | 297       | 299     | 298         | 296      |
| <b>5h</b> | 385, 304 | 384               | 380, 292 | 391       | 378     | 366         | 421, 371 |

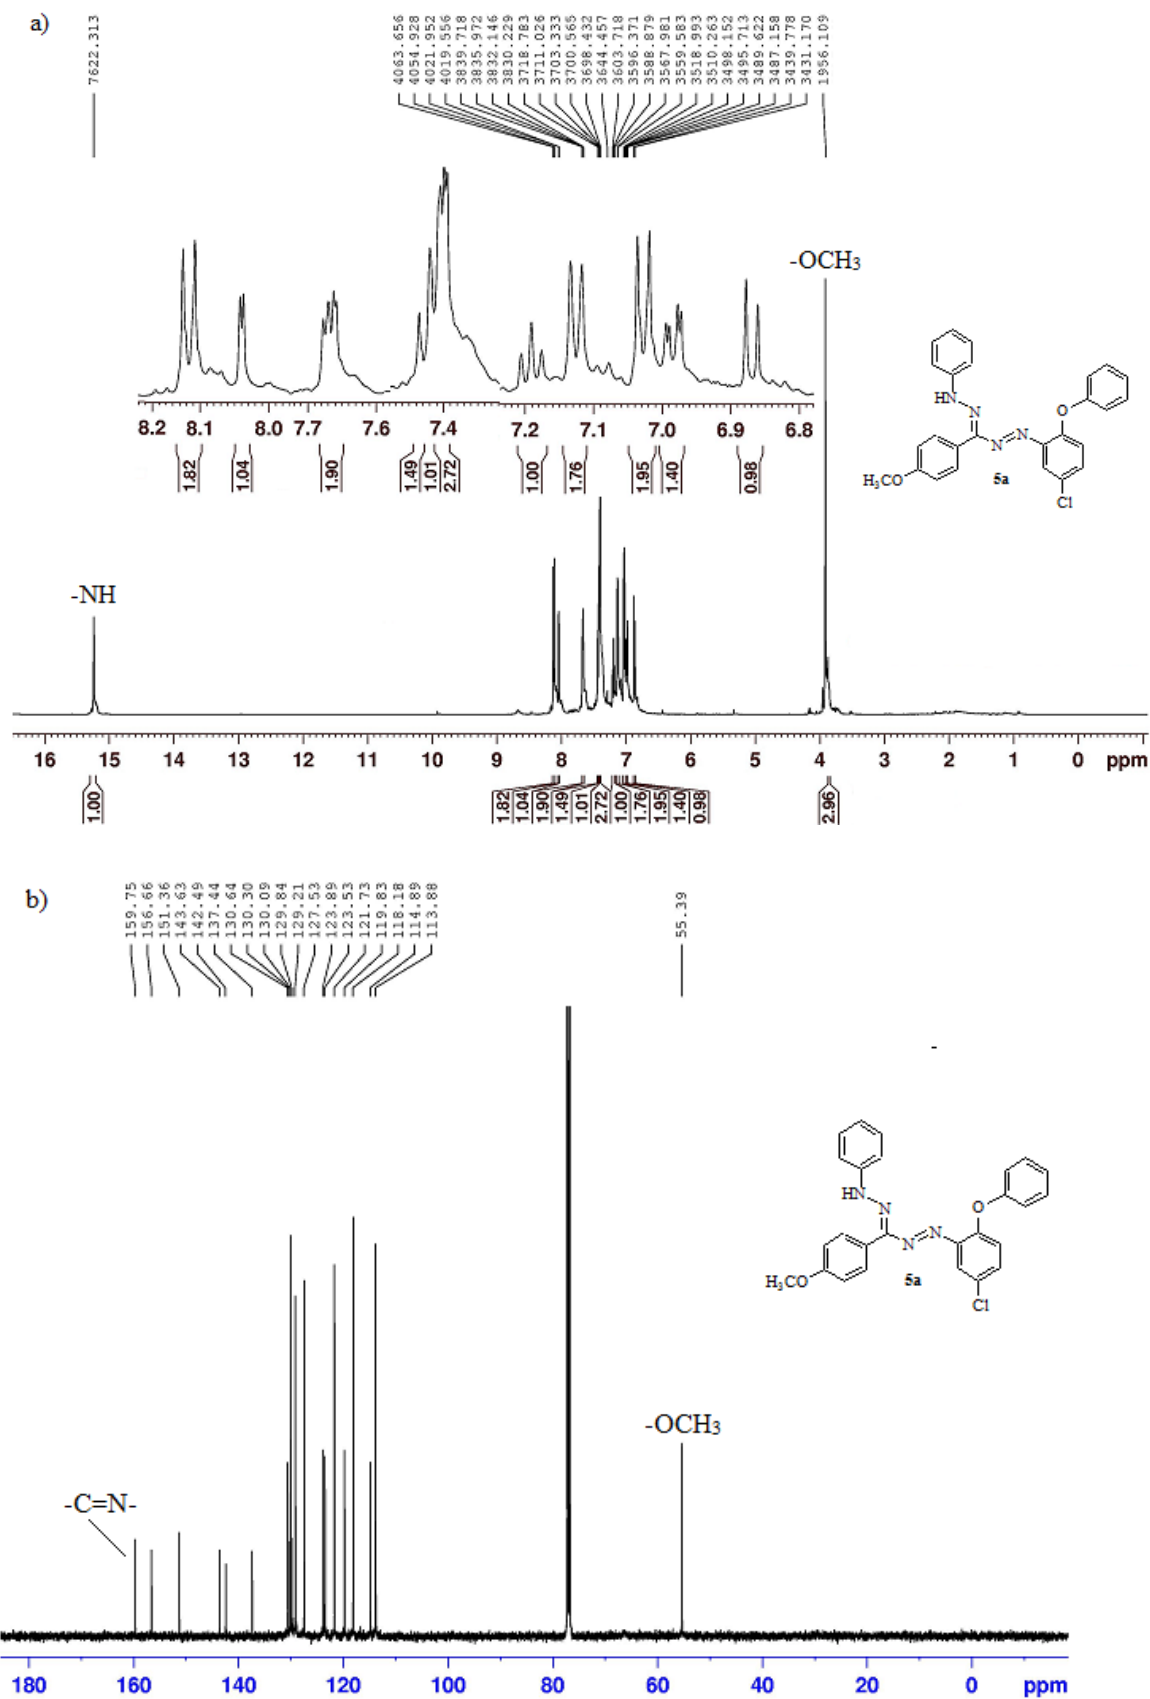

Figure S1 Compound **5a**: a)  $^1\text{H}$  NMR, b)  $^{13}\text{C}$  NMR spectrum.



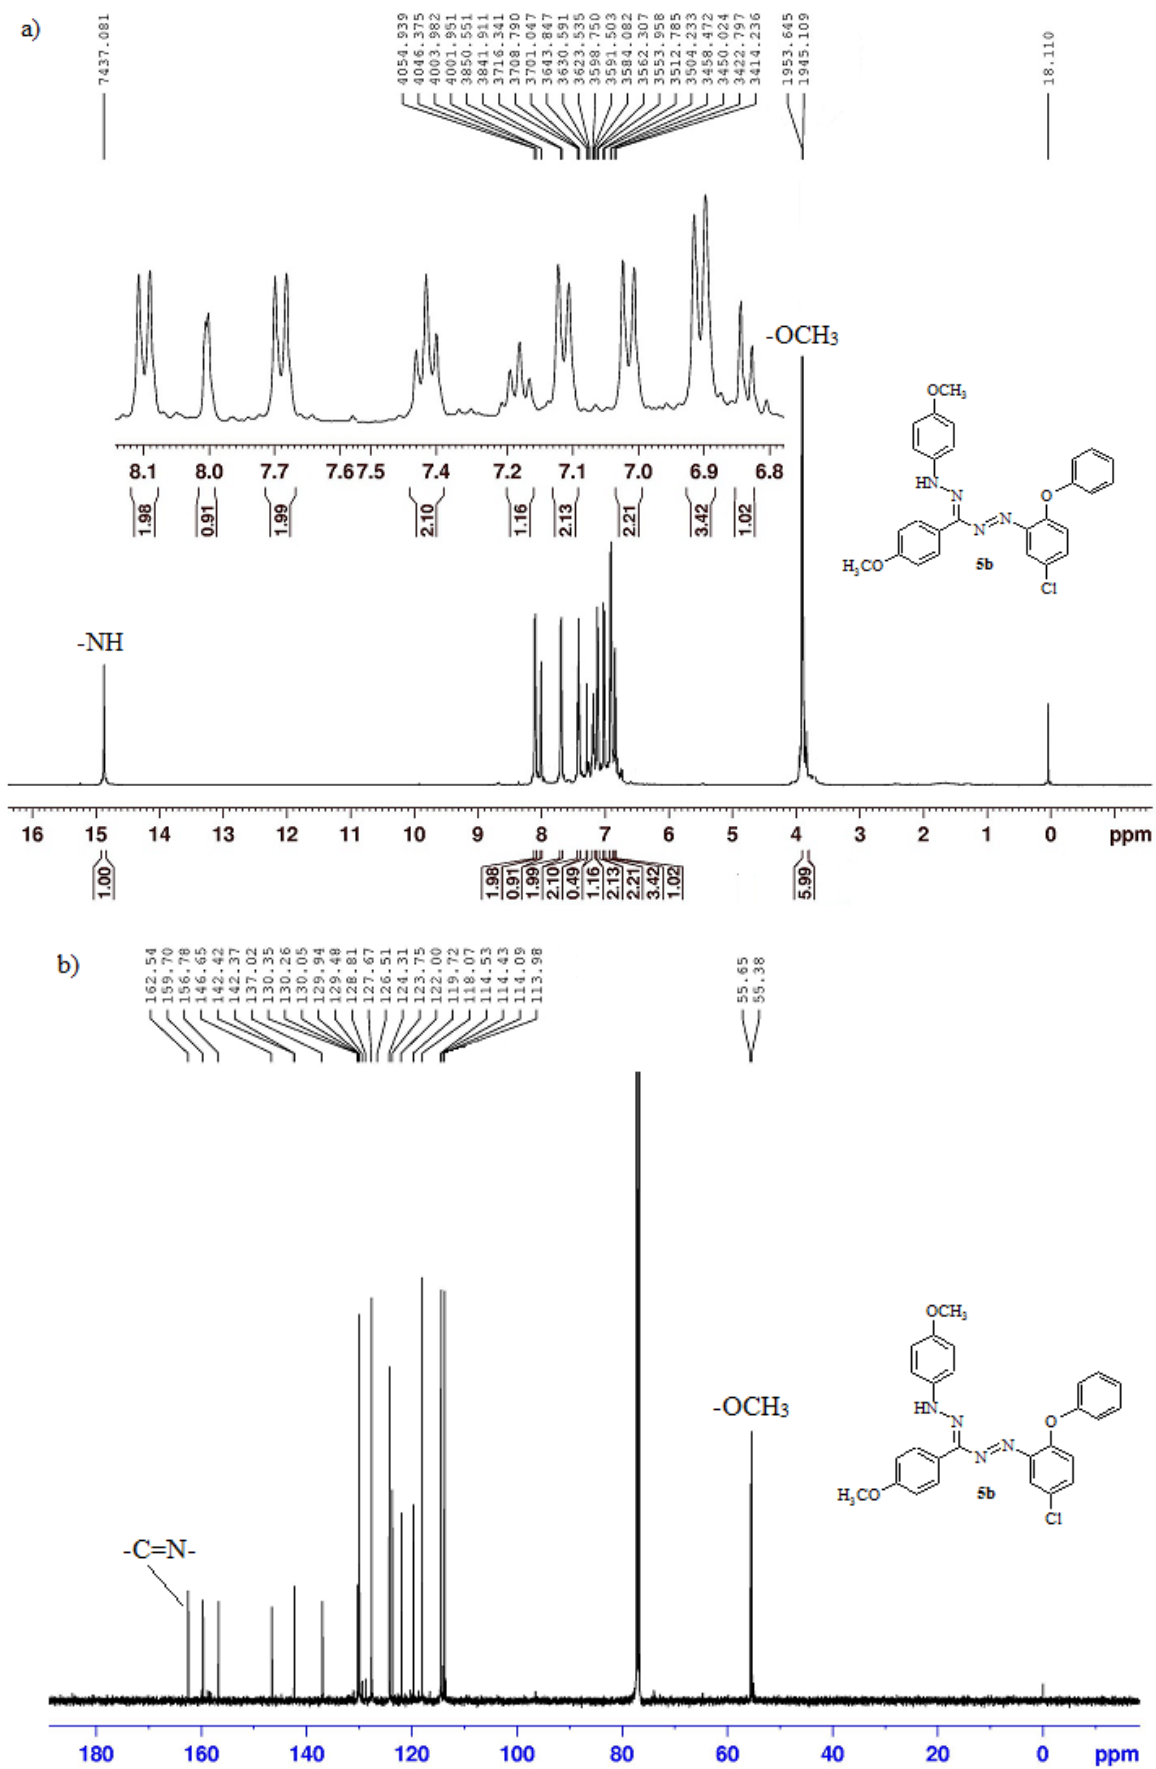

Figure S2 Compound **5b**: a)  $^1\text{H}$  NMR, b)  $^{13}\text{C}$  NMR spectrum.

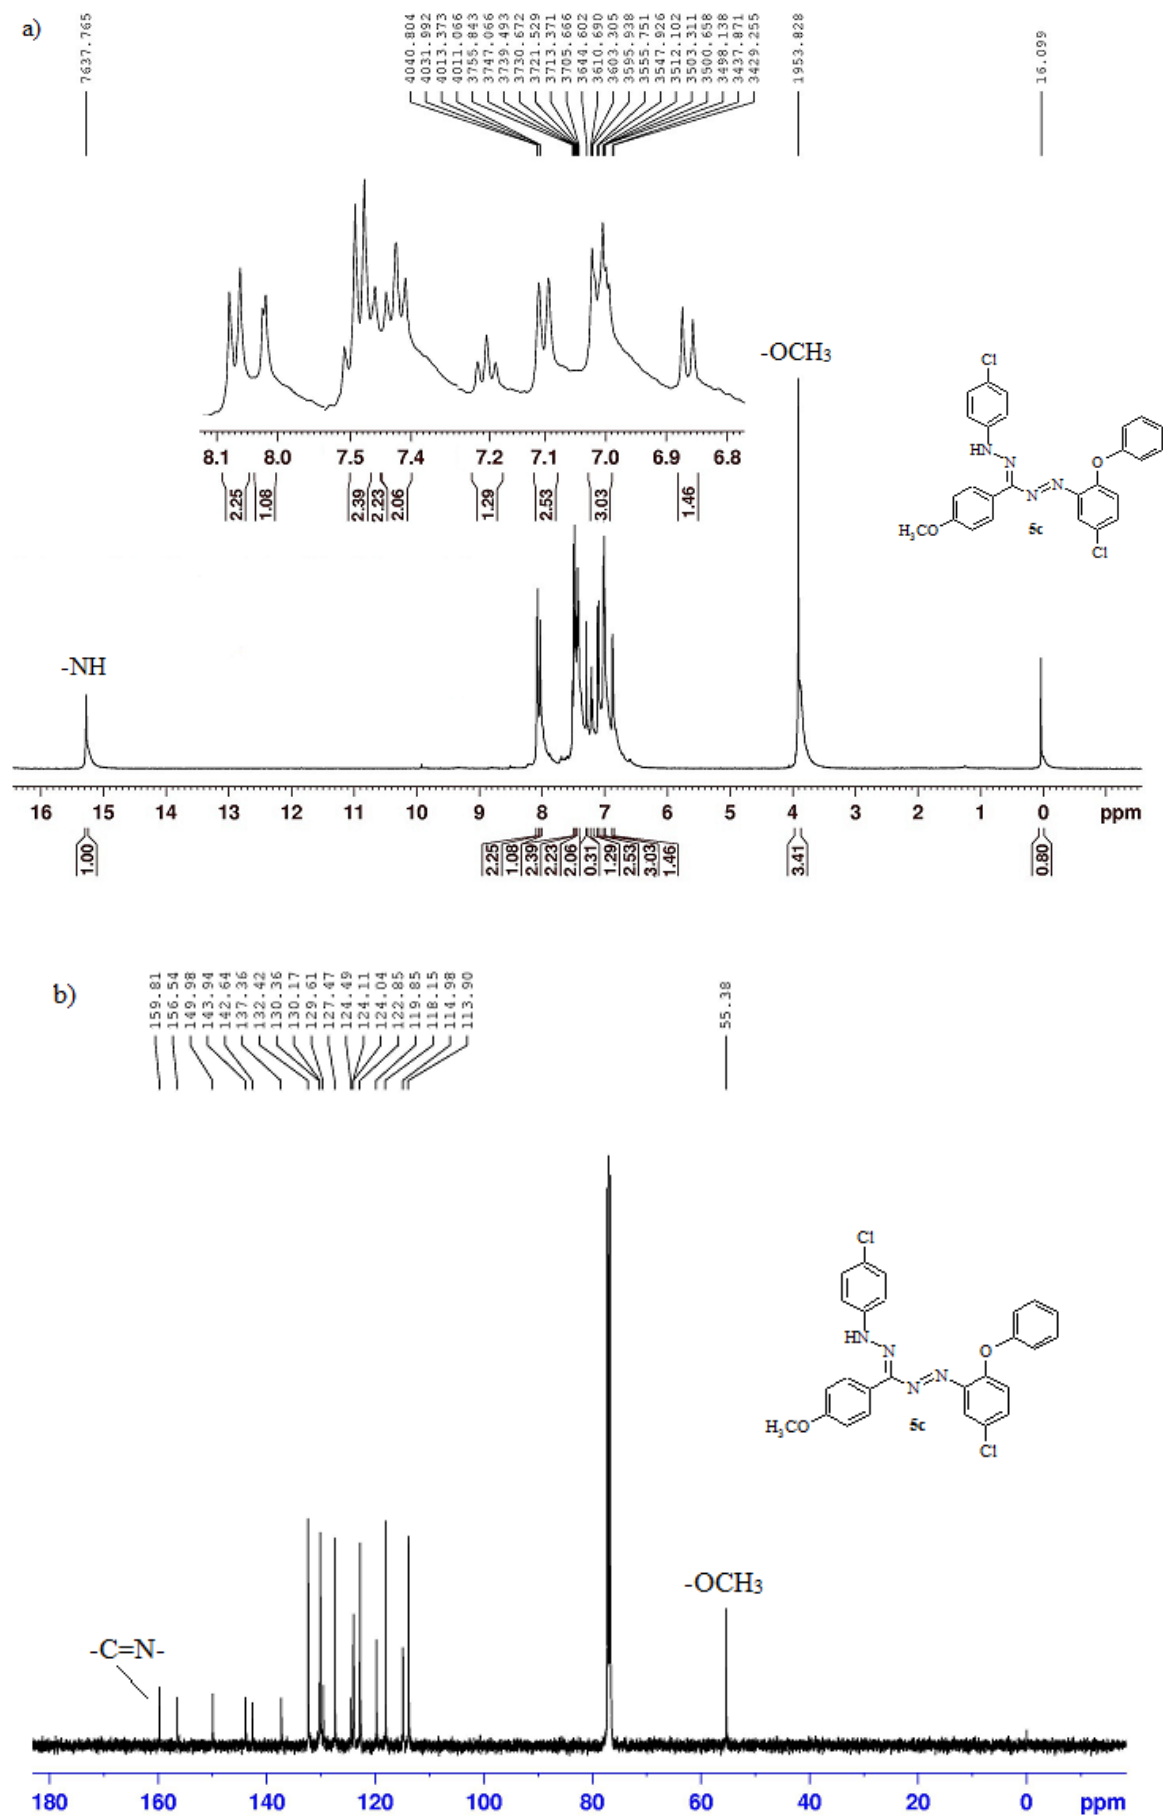

Figure S3 Compound 5c: a) <sup>1</sup>H NMR, b) <sup>13</sup>C NMR spectrum.

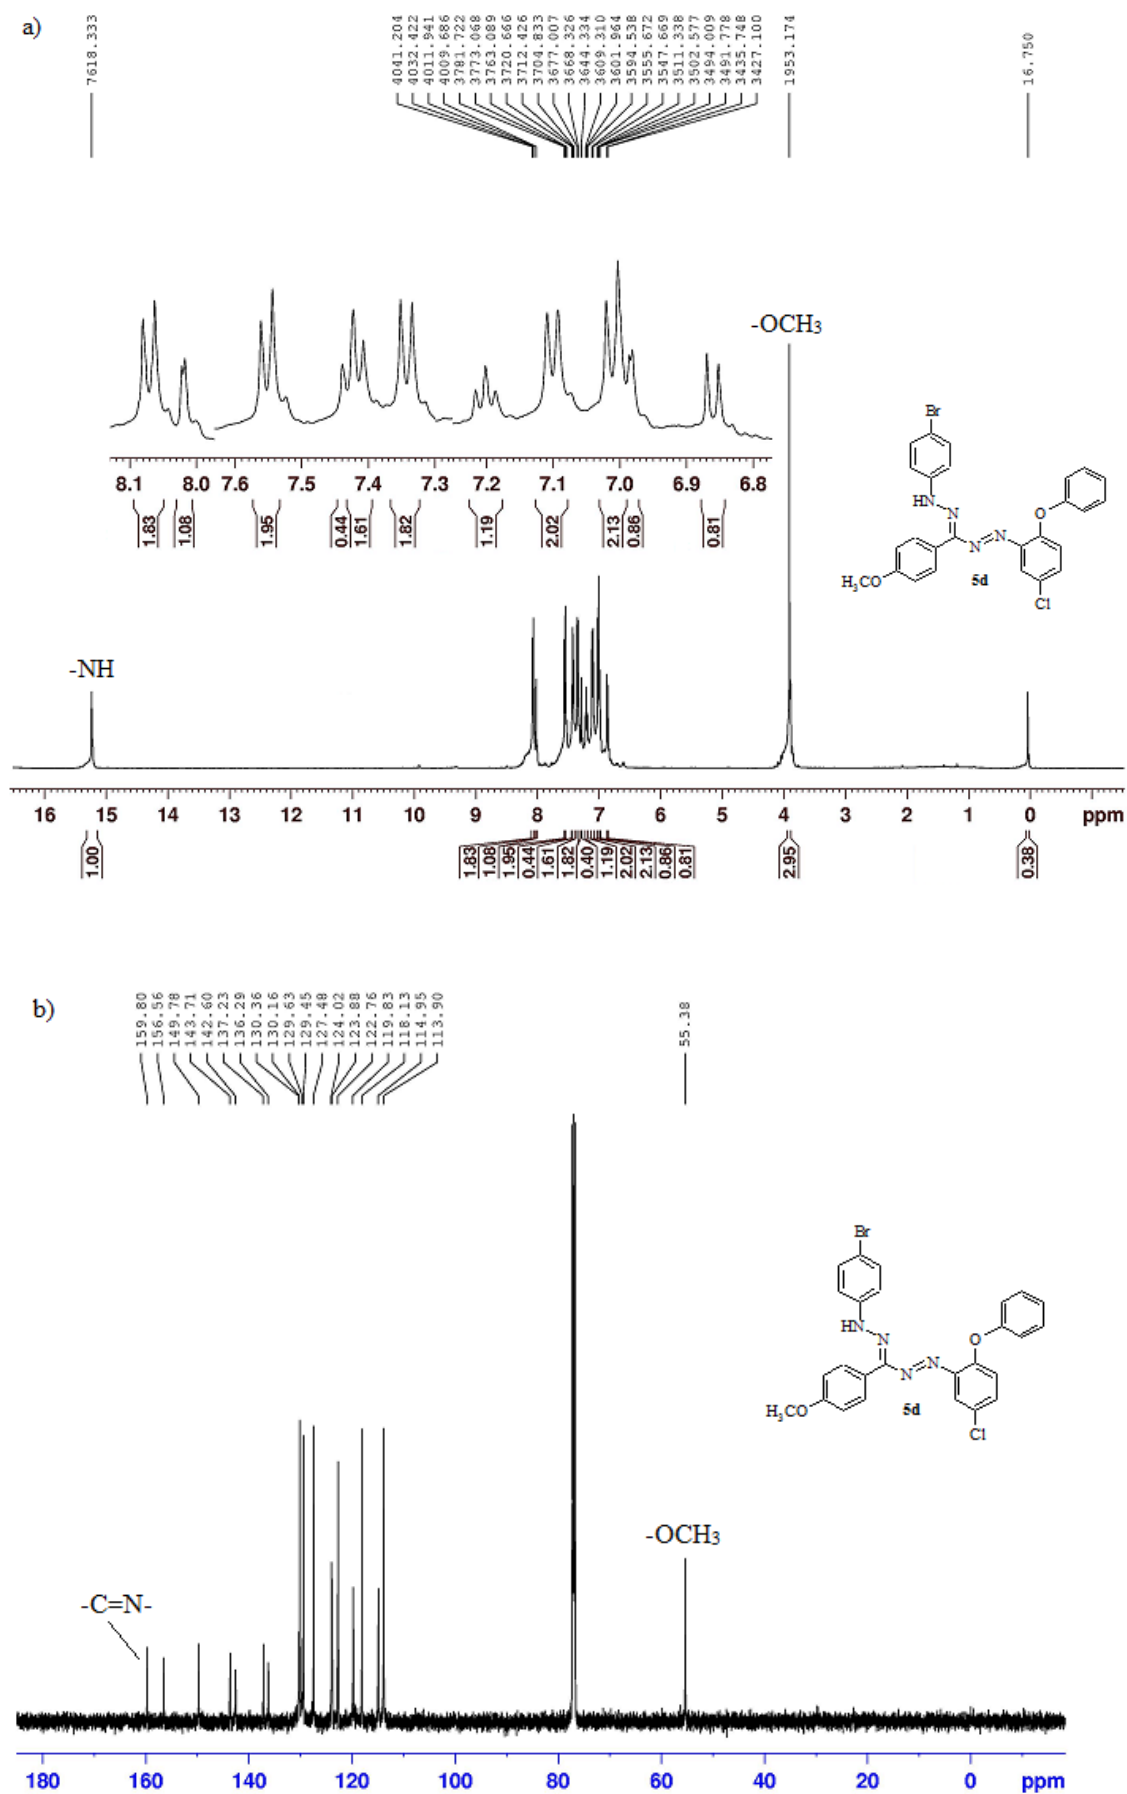

Figure S4 Compound **5d**: a)  $^1\text{H}$  NMR, b)  $^{13}\text{C}$  NMR spectrum.

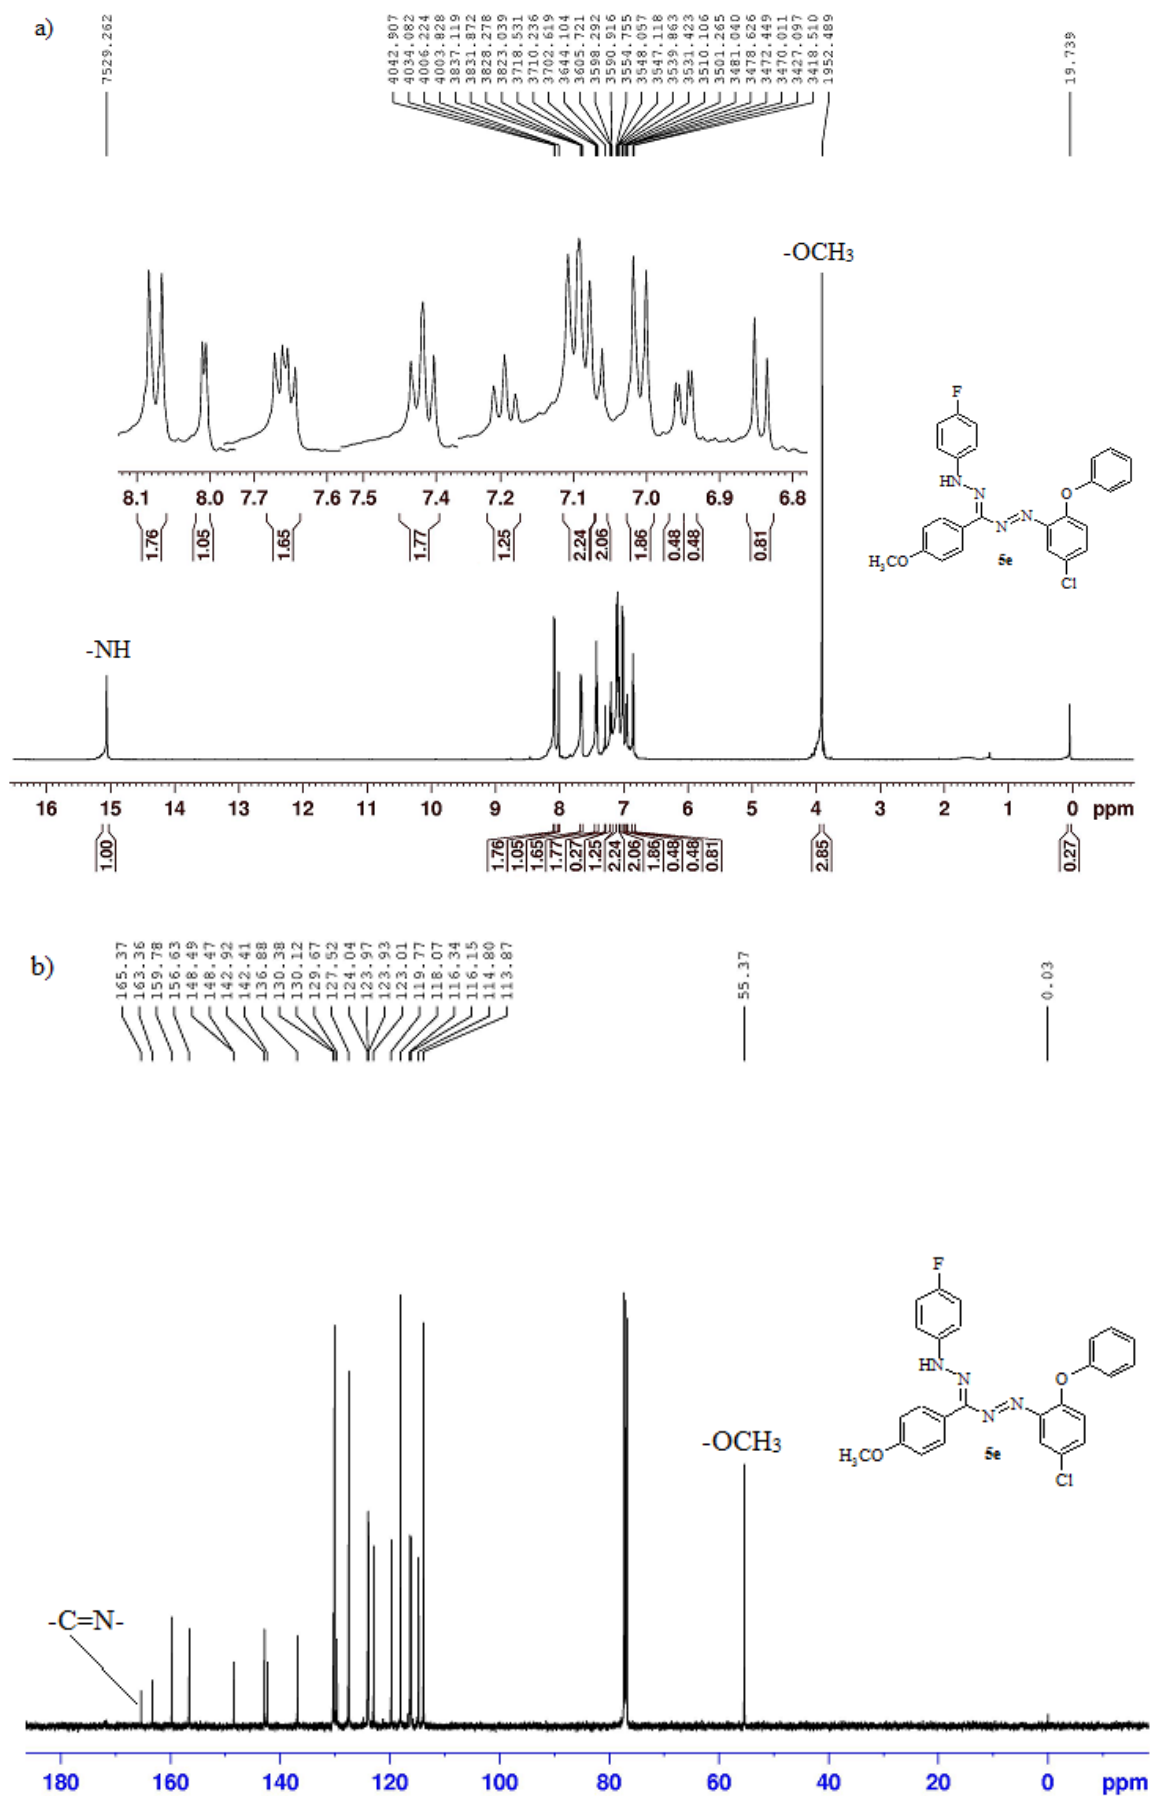

Figure S5 Compound 5e: a) <sup>1</sup>H NMR, b) <sup>13</sup>C NMR spectrum.

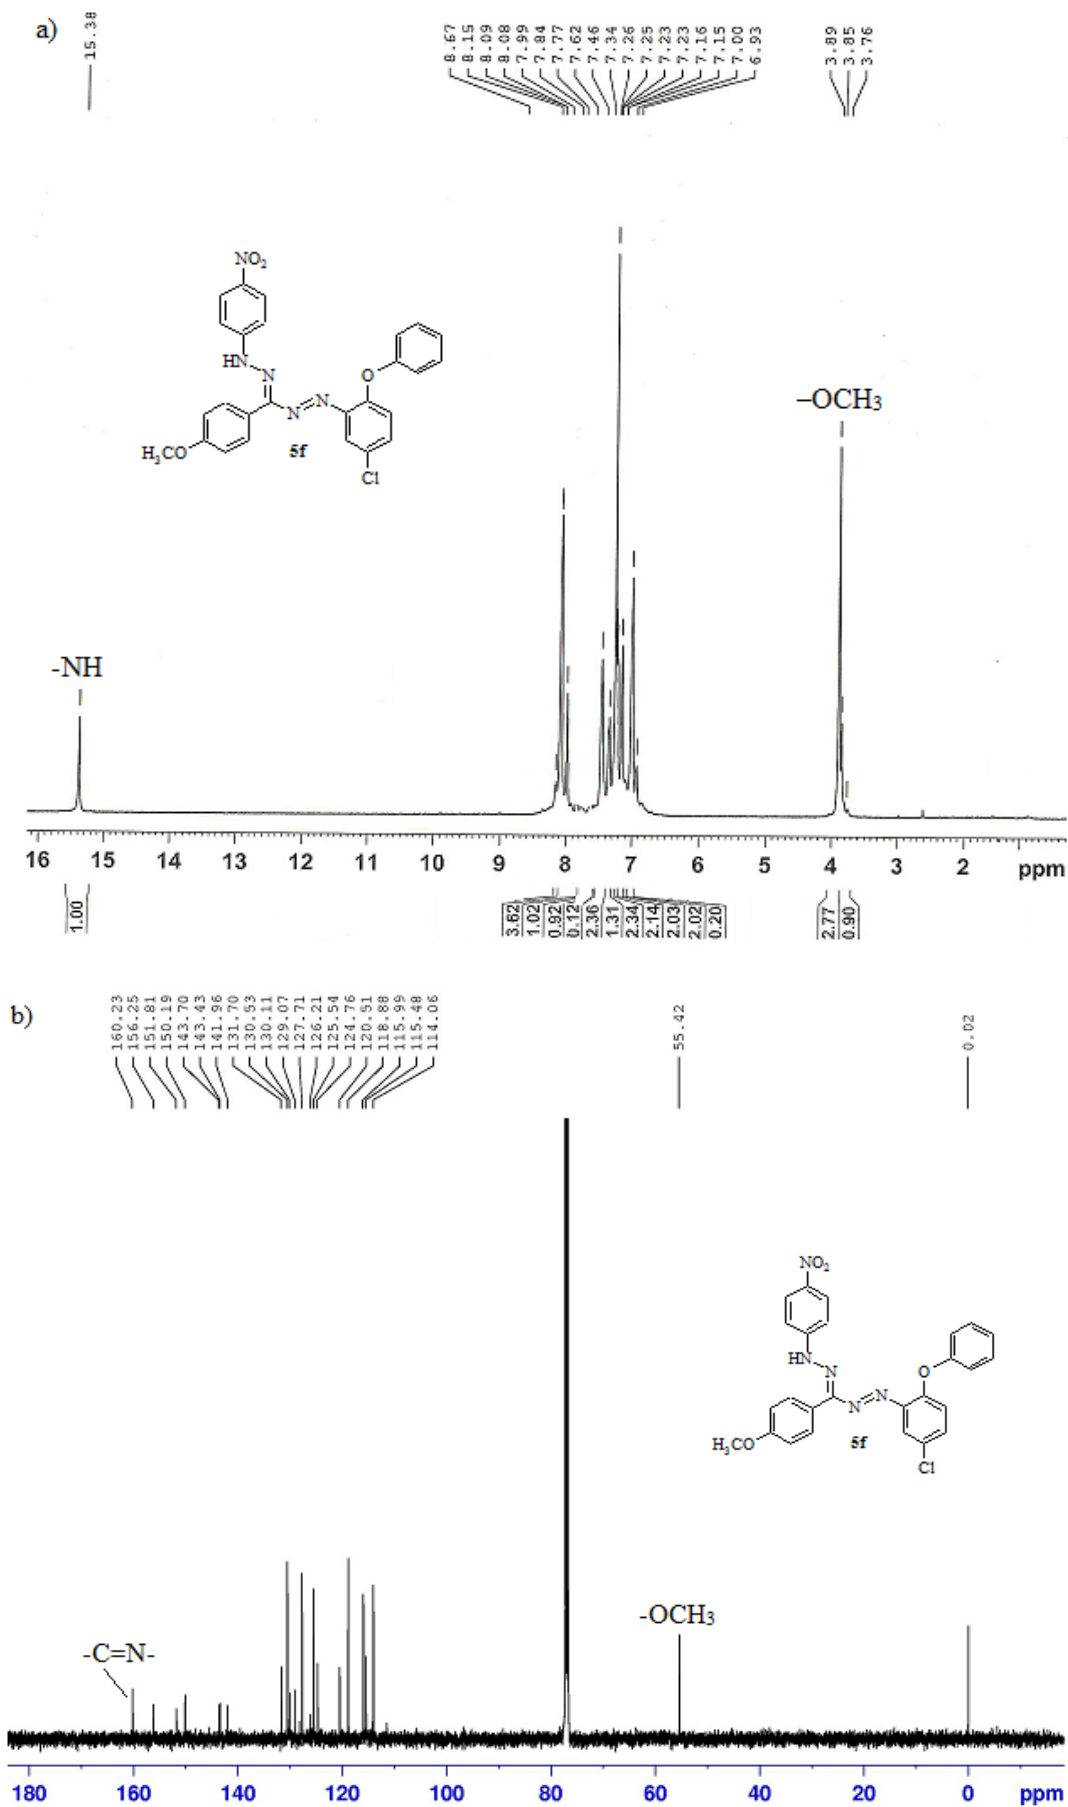

Figure S6 Compound **5f**: a) <sup>1</sup>H NMR, b) <sup>13</sup>C NMR spectrum.

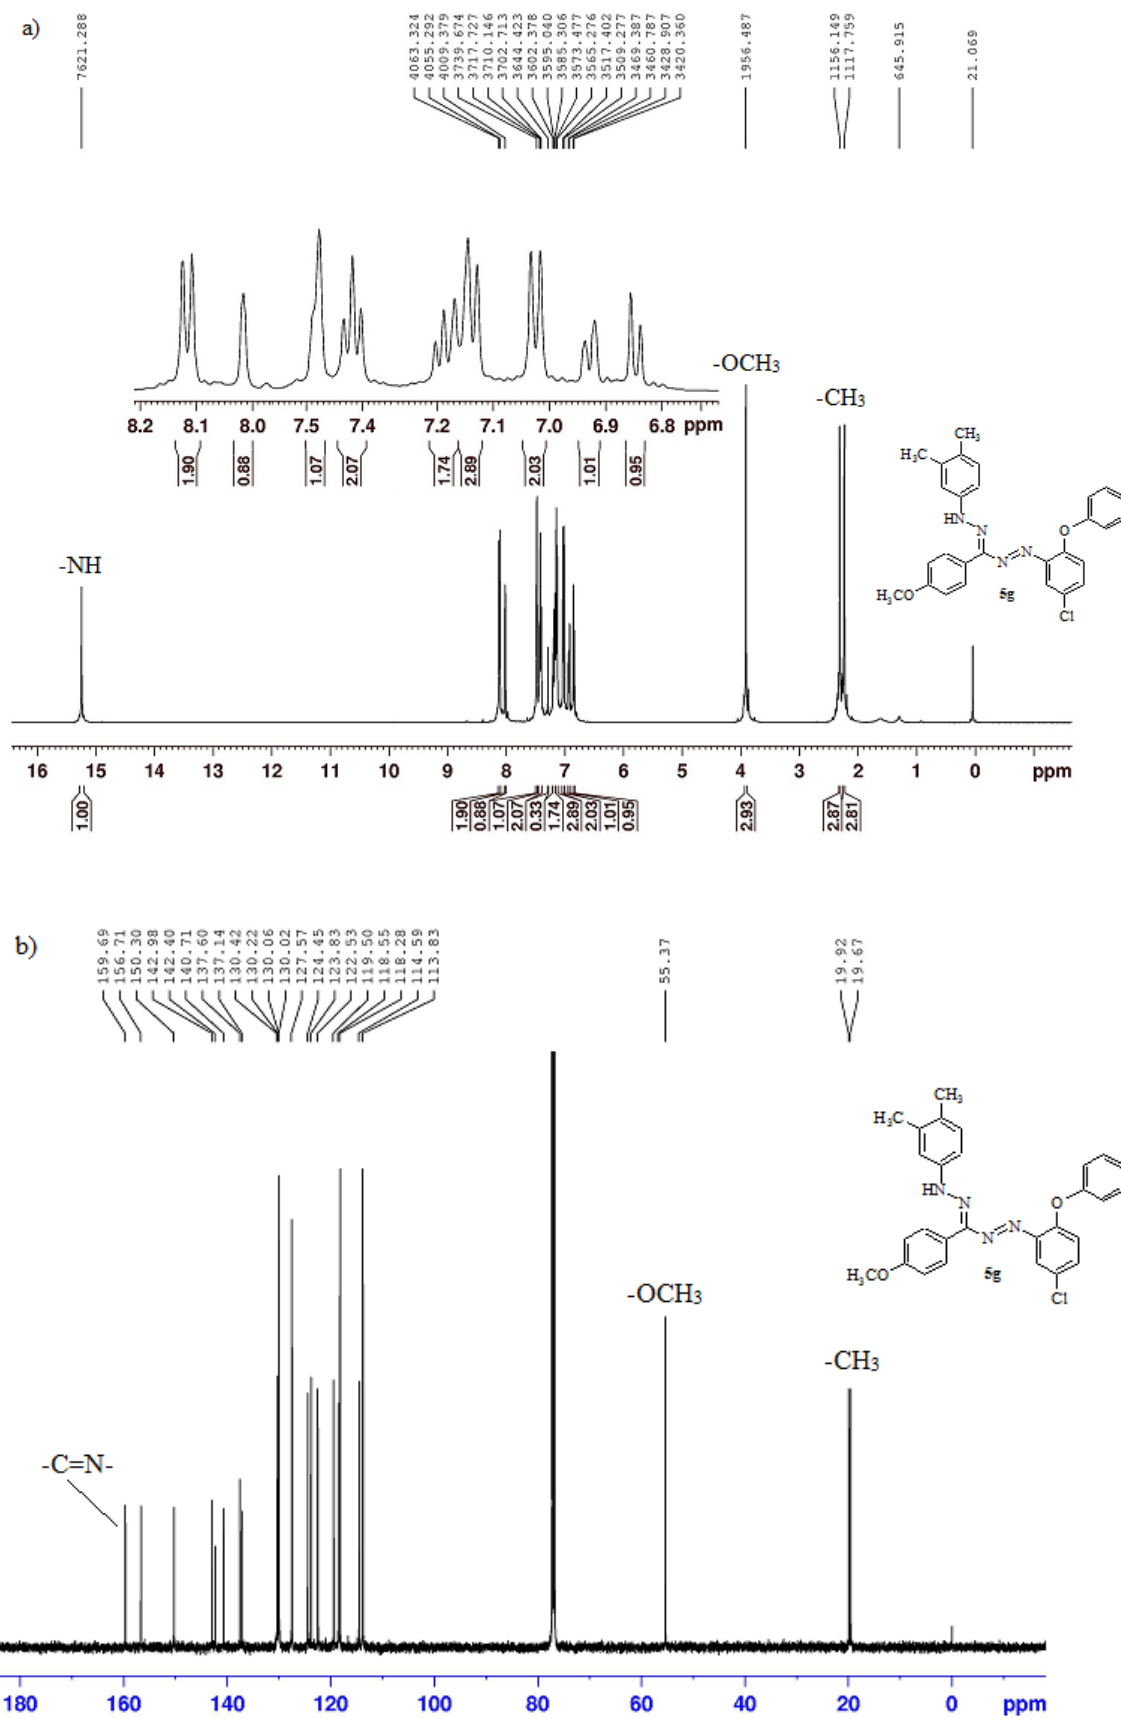

Figure S7 Compound 5g: a)  $^1\text{H}$  NMR, b)  $^{13}\text{C}$  NMR spectrum.

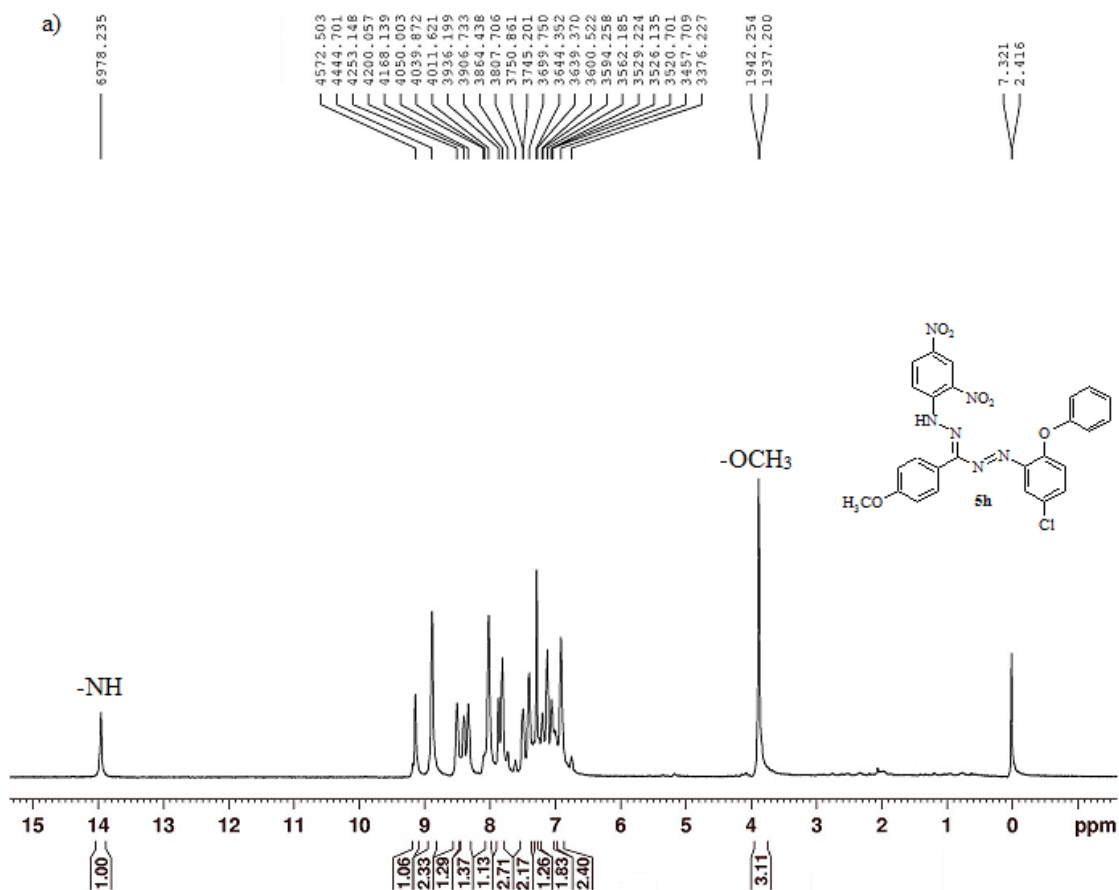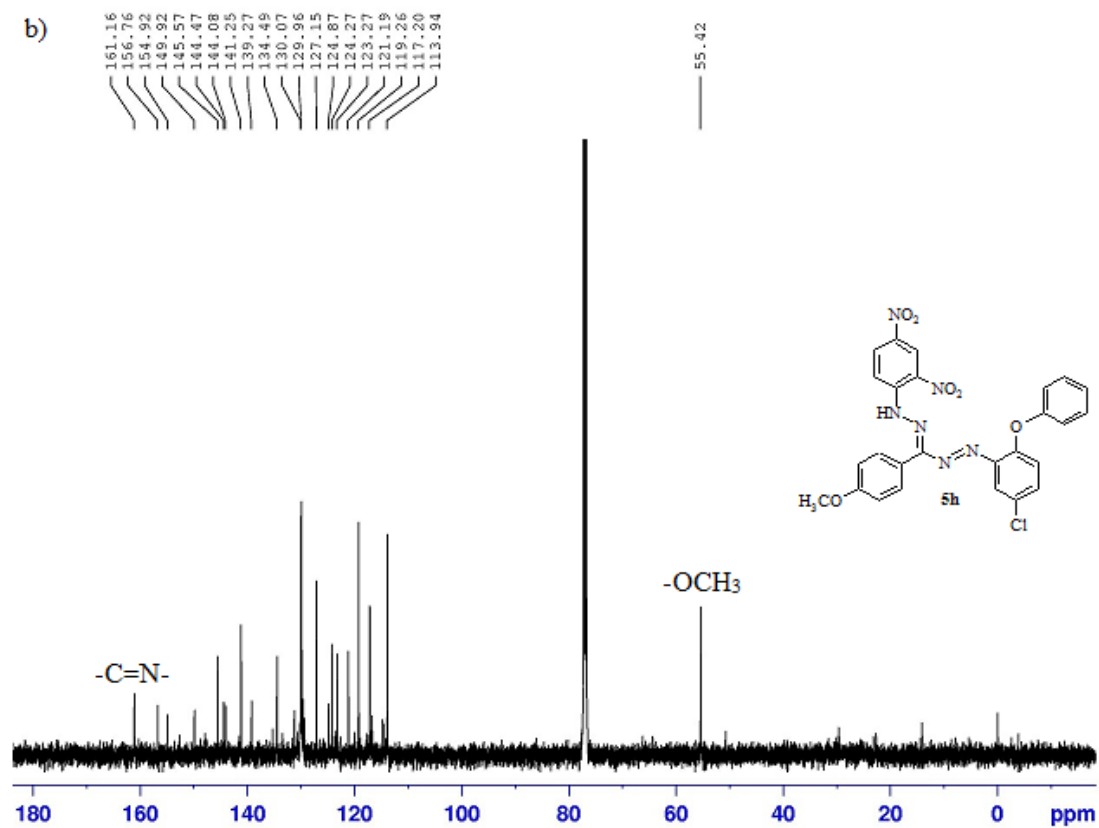

Figure S8 Compound **5h**: a)  $^1\text{H}$  NMR, b)  $^{13}\text{C}$  NMR spectrum.
